# Supplementary material
Source: publisher figshare collection journal article supplement (https://gsajournals.figshare.com/ndownloader/files/15193466)
Supplement: Supplementary file 1 [file 15193466]

## Sheet: GO terms for Clusters
	Supplementary Table 11: GO terms for genes in Soft clustering of normalized expressed genes using Mfuzz (Kumar 2007) package in ‘R’ program. We used the g:Profiler -- a web server for functional interpretation of gene lists. ( g:GOSt Gene Group Functional Profiling). PARAMETERS: user_thr (p-valu) = 0.001. Significance threshold: g: SCS threshold for GO term determination in Tribolium genome.
	Cluster-1 GO terms (Biological, Cellular component and Molecular Function)
	p-value	T	Q	Q&T	Q&T/Q	Q&T/T	term ID	t type	t group	t name	t depth
	6.71e-07	571	533	64	0.12	0.112	GO:0036211	BP	3	protein modification process	1
	6.71e-07	571	533	64	0.12	0.112	GO:0006464	BP	3	cellular protein modification process	2
	1.06e-06	856	533	84	0.158	0.098	GO:0044267	BP	3	cellular protein metabolic process	1
	4.46e-06	626	533	66	0.124	0.105	GO:0043412	BP	3	macromolecule modification	1
	6.22e-06	1129	533	100	0.188	0.089	GO:0016740	MF	7	transferase activity	1
	9.04e-06	385	533	47	0.088	0.122	GO:0016301	MF	5	kinase activity	1
	1.33e-05	75	533	18	0.034	0.24	GO:0005794	CC	1	Golgi apparatus	1
	1.8e-05	53	533	15	0.028	0.283	GO:0098791	CC	1	Golgi subcompartment	3
	2.06e-05	61	533	16	0.03	0.262	GO:0044431	CC	1	Golgi apparatus part	2
	3.56e-05	243	533	34	0.064	0.14	GO:0006468	BP	3	protein phosphorylation	2
	5.08e-05	294	533	38	0.071	0.129	GO:0016773	MF	5	phosphotransferase activity, alcohol group as acceptor	1
	6.11e-05	170	533	27	0.051	0.159	GO:0001883	MF	4	purine nucleoside binding	2
	6.11e-05	170	533	27	0.051	0.159	GO:0032550	MF	4	purine ribonucleoside binding	3
	6.11e-05	170	533	27	0.051	0.159	GO:0005525	MF	4	GTP binding	1
	6.92e-05	171	533	27	0.051	0.158	GO:0019001	MF	4	guanyl nucleotide binding	1
	6.92e-05	171	533	27	0.051	0.158	GO:0032561	MF	4	guanyl ribonucleotide binding	2
	7.08e-05	120	533	22	0.041	0.183	GO:0003924	MF	6	GTPase activity	1
	7.09e-05	3519	533	235	0.441	0.067	GO:0009987	BP	2	cellular process	1
	9.97e-05	174	533	27	0.051	0.155	GO:0032549	MF	4	ribonucleoside binding	2
	0.000103	242	533	33	0.062	0.136	GO:0004672	MF	5	protein kinase activity	2
	0.000112	175	533	27	0.051	0.154	GO:0001882	MF	4	nucleoside binding	1
	0.000147	115	533	21	0.039	0.183	GO:0016192	BP	8	vesicle-mediated transport	1
	0.000501	296	533	36	0.068	0.122	GO:0016310	BP	3	phosphorylation	1
	0.000612	611	533	59	0.111	0.097	GO:0007165	BP	2	signal transduction	1
	Cluster-2 GO terms (Biological, Cellular component and Molecular Function)
	p-value	T	Q	Q&T	Q&T/Q	Q&T/T	term ID	t type	t group	t name	t depth
	2.03e-13	3361	904	401	0.444	0.119	GO:0016021	CC	4	integral component of membrane	4
	2.52e-13	3365	904	401	0.444	0.119	GO:0031224	CC	4	intrinsic component of membrane	3
	5.55e-12	3456	904	404	0.447	0.117	GO:0044425	CC	4	membrane part	2
	8.56e-12	57	904	27	0.03	0.474	GO:0007155	BP	6	cell adhesion	2
	1.47e-11	58	904	27	0.03	0.466	GO:0022610	BP	6	biological adhesion	1
	1.87e-11	3578	904	413	0.457	0.115	GO:0016020	CC	4	membrane	1
	2.32e-11	187	904	51	0.056	0.273	GO:0005509	MF	13	calcium ion binding	1
	1.24e-09	82	904	30	0.033	0.366	GO:0044459	CC	4	plasma membrane part	3
	2.56e-07	82	904	27	0.03	0.329	GO:0008061	MF	1	chitin binding	1
	3.61e-07	100	904	30	0.033	0.3	GO:0022836	MF	9	gated channel activity	5
	4.29e-07	176	904	42	0.046	0.239	GO:0022803	MF	9	passive transmembrane transporter activity	3
	4.29e-07	176	904	42	0.046	0.239	GO:0015267	MF	9	channel activity	4
	8.18e-07	302	904	59	0.065	0.195	GO:0006811	BP	8	ion transport	1
	9.98e-07	98	904	29	0.032	0.296	GO:0022839	MF	9	ion gated channel activity	4
	1.03e-06	174	904	41	0.045	0.236	GO:0022838	MF	9	substrate-specific channel activity	5
	1.03e-06	174	904	41	0.045	0.236	GO:0005216	MF	9	ion channel activity	4
	1.09e-06	18	904	12	0.013	0.667	GO:0098742	BP	6	cell-cell adhesion via plasma-membrane adhesion molecules	4
	1.09e-06	18	904	12	0.013	0.667	GO:0007156	BP	6	homophilic cell adhesion via plasma membrane adhesion molecules	5
	1.31e-06	217	904	47	0.052	0.217	GO:0005576	CC	2	extracellular region	1
	2.71e-06	19	904	12	0.013	0.632	GO:0098609	BP	6	cell-cell adhesion	3
	6e-06	65	904	22	0.024	0.338	GO:0006030	BP	10	chitin metabolic process	2
	1.36e-05	115	904	30	0.033	0.261	GO:0042302	MF	12	structural constituent of cuticle	1
	1.54e-05	68	904	22	0.024	0.324	GO:1901071	BP	10	glucosamine-containing compound metabolic process	2
	2.08e-05	69	904	22	0.024	0.319	GO:0006040	BP	10	amino sugar metabolic process	1
	2.17e-05	305	904	56	0.062	0.184	GO:0015075	MF	9	ion transmembrane transporter activity	3
	2.64e-05	291	904	54	0.06	0.186	GO:0015318	MF	9	inorganic molecular entity transmembrane transporter activity	3
	2.71e-05	583	904	89	0.098	0.153	GO:0005215	MF	9	transporter activity	1
	2.79e-05	39	904	16	0.018	0.41	GO:0044456	CC	3	synapse part	2
	3.07e-05	44	904	17	0.019	0.386	GO:0031226	CC	4	intrinsic component of plasma membrane	4
	3.07e-05	44	904	17	0.019	0.386	GO:0005887	CC	4	integral component of plasma membrane	5
	3.25e-05	94	904	26	0.029	0.277	GO:0005261	MF	9	cation channel activity	5
	7.49e-05	1011	904	134	0.148	0.133	GO:0051179	BP	5	localization	1
	0.000125	53	904	18	0.02	0.34	GO:0045202	CC	3	synapse	1
	0.000143	76	904	22	0.024	0.289	GO:0006022	BP	10	aminoglycan metabolic process	1
	0.00019	450	904	71	0.079	0.158	GO:0022857	MF	9	transmembrane transporter activity	2
	0.000192	49	904	17	0.019	0.347	GO:0030054	CC	7	cell junction	1
	0.000241	30	904	13	0.014	0.433	GO:1902495	CC	4	transmembrane transporter complex	5
	0.000299	40	904	15	0.017	0.375	GO:0098797	CC	4	plasma membrane protein complex	4
	0.000383	31	904	13	0.014	0.419	GO:1990351	CC	4	transporter complex	1
	0.000573	23	904	11	0.012	0.478	GO:0034702	CC	4	ion channel complex	6
	0.000793	48	904	16	0.018	0.333	GO:0006813	BP	11	potassium ion transport	2
	0.000834	123	904	28	0.031	0.228	GO:0030001	BP	11	metal ion transport	1
	Cluster-3 GO terms (Biological, Cellular component and Molecular Function)
	p-value	T	Q	Q&T	Q&T/Q	Q&T/T	term ID	t type	t group	t name	t depth
	4.11e-19	192	196	32	0.163	0.167	GO:0004252	MF	1	serine-type endopeptidase activity	5
	9.42e-18	212	196	32	0.163	0.151	GO:0017171	MF	1	serine hydrolase activity	2
	9.42e-18	212	196	32	0.163	0.151	GO:0008236	MF	1	serine-type peptidase activity	4
	4.8e-15	497	196	43	0.219	0.087	GO:0008233	MF	1	peptidase activity	2
	1.4e-13	519	196	42	0.214	0.081	GO:0006508	BP	2	proteolysis	2
	2.57e-13	478	196	40	0.204	0.084	GO:0070011	MF	1	peptidase activity, acting on L-amino acid peptides	3
	7.06e-13	329	196	33	0.168	0.1	GO:0004175	MF	1	endopeptidase activity	4
	1.27e-12	1610	196	75	0.383	0.047	GO:1901564	BP	2	organonitrogen compound metabolic process	2
	4.52e-09	1268	196	59	0.301	0.047	GO:0019538	BP	2	protein metabolic process	1
	5.99e-07	76	196	13	0.066	0.171	GO:0006022	BP	2	aminoglycan metabolic process	3
	1.06e-06	65	196	12	0.061	0.185	GO:0006030	BP	2	chitin metabolic process	4
	1.83e-06	68	196	12	0.061	0.176	GO:1901071	BP	2	glucosamine-containing compound metabolic process	2
	2.03e-06	958	196	45	0.23	0.047	GO:0140096	MF	1	catalytic activity, acting on a protein	1
	2.17e-06	69	196	12	0.061	0.174	GO:0006040	BP	2	amino sugar metabolic process	1
	1.04e-05	217	196	19	0.097	0.088	GO:0005576	CC	4	extracellular region	1
	1.65e-05	82	196	12	0.061	0.146	GO:0008061	MF	3	chitin binding	1
	4.19e-05	2370	196	77	0.393	0.032	GO:0043170	BP	2	macromolecule metabolic process	1
	4.68e-05	127	196	14	0.071	0.11	GO:0003735	MF	6	structural constituent of ribosome	1
	0.0001	156	196	15	0.077	0.096	GO:0005840	CC	5	ribosome	1
	0.000272	2658	196	81	0.413	0.03	GO:0006807	BP	2	nitrogen compound metabolic process	1
	0.00068	1568	196	55	0.281	0.035	GO:0016787	MF	1	hydrolase activity	1
	Cluster-4 GO terms (Biological, Cellular component and Molecular Function)
	p-value	T	Q	Q&T	Q&T/Q	Q&T/T	term ID	t type	t group	t name	t depth
	3.15e-17	1962	619	208	0.336	0.106	GO:0044424	CC	2	intracellular part	4
	2.2e-16	2243	619	226	0.365	0.101	GO:0005622	CC	2	intracellular	3
	1.57e-13	450	619	74	0.12	0.164	GO:0071840	BP	4	cellular component organization or biogenesis	1
	4.59e-13	409	619	69	0.111	0.169	GO:0016043	BP	4	cellular component organization	2
	8.79e-12	1629	619	168	0.271	0.103	GO:0043229	CC	2	intracellular organelle	5
	1.07e-11	1646	619	169	0.273	0.103	GO:0043226	CC	2	organelle	1
	1.86e-11	293	619	54	0.087	0.184	GO:0006996	BP	4	organelle organization	3
	4.49e-11	1299	619	141	0.228	0.109	GO:0043227	CC	2	membrane-bounded organelle	2
	6.49e-11	1279	619	139	0.225	0.109	GO:0043231	CC	2	intracellular membrane-bounded organelle	6
	7.01e-10	826	619	100	0.162	0.121	GO:0032991	CC	2	protein-containing complex	1
	8.04e-10	686	619	88	0.142	0.128	GO:0044422	CC	2	organelle part	1
	1.17e-09	679	619	87	0.141	0.128	GO:0044446	CC	2	intracellular organelle part	2
	4.59e-08	2765	619	234	0.378	0.085	GO:0005623	CC	2	cell	1
	8.44e-08	203	619	38	0.061	0.187	GO:0044428	CC	2	nuclear part	3
	1.59e-07	2707	619	228	0.368	0.084	GO:0044464	CC	2	cell part	2
	5.94e-07	876	619	96	0.155	0.11	GO:0005737	CC	2	cytoplasm	5
	1.41e-06	916	619	98	0.158	0.107	GO:0005634	CC	2	nucleus	7
	1.13e-05	163	619	30	0.048	0.184	GO:0031974	CC	2	membrane-enclosed lumen	1
	1.13e-05	163	619	30	0.048	0.184	GO:0043233	CC	2	organelle lumen	2
	1.13e-05	163	619	30	0.048	0.184	GO:0070013	CC	2	intracellular organelle lumen	3
	1.87e-05	29	619	12	0.019	0.414	GO:0007005	BP	4	mitochondrion organization	4
	2.66e-05	107	619	23	0.037	0.215	GO:0030163	BP	1	protein catabolic process	1
	0.000129	143	619	26	0.042	0.182	GO:0009057	BP	1	macromolecule catabolic process	1
	0.000287	95	619	20	0.032	0.211	GO:0044257	BP	1	cellular protein catabolic process	2
	0.000287	95	619	20	0.032	0.211	GO:0051603	BP	1	proteolysis involved in cellular protein catabolic process	1
	0.000329	122	619	23	0.037	0.189	GO:0044265	BP	1	cellular macromolecule catabolic process	1
	0.000355	15	619	8	0.013	0.533	GO:0005839	CC	2	proteasome core complex	2
	0.000355	15	619	8	0.013	0.533	GO:0070003	MF	3	threonine-type peptidase activity	1
	0.000355	15	619	8	0.013	0.533	GO:0004298	MF	3	threonine-type endopeptidase activity	2
	0.000428	973	619	94	0.152	0.097	GO:0010467	BP	5	gene expression	1
	0.00044	89	619	19	0.031	0.213	GO:0016071	BP	6	mRNA metabolic process	1
	0.000508	856	619	85	0.137	0.099	GO:0044267	BP	1	cellular protein metabolic process	1
	0.000827	197	619	30	0.048	0.152	GO:0006396	BP	5	RNA processing	1
	Cluster-5 GO terms (Biological, Cellular component and Molecular Function)
	p-value	T	Q	Q&T	Q&T/Q	Q&T/T	term ID	t type	t group	t name	t depth
	0.000313	2019	358	107	0.299	0.053	GO:0005515	MF	1	protein binding	1
	Cluster-6 GO terms (Biological, Cellular component and Molecular Function)
	p-value	T	Q	Q&T	Q&T/Q	Q&T/T	term ID	t type	t group	t name	t depth
	5.2e-18	3661	514	280	0.545	0.076	GO:0003824	MF	3	catalytic activity	1
	1.15e-17	1568	514	157	0.305	0.1	GO:0016787	MF	3	hydrolase activity	2
	2.15e-14	52	514	23	0.045	0.442	GO:0015078	MF	3	proton transmembrane transporter activity	4
	7.02e-12	620	514	77	0.15	0.124	GO:0016491	MF	3	oxidoreductase activity	2
	2.47e-11	583	514	73	0.142	0.125	GO:0005215	MF	7	transporter activity	1
	5.77e-10	430	514	58	0.113	0.135	GO:0055085	BP	9	transmembrane transport	4
	1.34e-09	31	514	15	0.029	0.484	GO:0016469	CC	2	proton-transporting two-sector ATPase complex	2
	3.93e-09	450	514	58	0.113	0.129	GO:0022857	MF	7	transmembrane transporter activity	2
	4.12e-09	3578	514	248	0.482	0.069	GO:0016020	CC	2	membrane	1
	4.21e-09	33	514	15	0.029	0.455	GO:1902600	BP	9	proton transmembrane transport	1
	5.78e-09	127	514	28	0.054	0.22	GO:0016798	MF	3	hydrolase activity, acting on glycosyl bonds	3
	5.91e-09	3456	514	241	0.469	0.07	GO:0044425	CC	2	membrane part	2
	1.56e-08	478	514	59	0.115	0.123	GO:0070011	MF	3	peptidase activity, acting on L-amino acid peptides	2
	2.62e-08	497	514	60	0.117	0.121	GO:0008233	MF	3	peptidase activity	1
	5.49e-08	506	514	60	0.117	0.119	GO:0055114	BP	6	oxidation-reduction process	1
	7.99e-08	141	514	28	0.054	0.199	GO:0015077	MF	3	monovalent inorganic cation transmembrane transporter activity	3
	9.15e-08	212	514	35	0.068	0.165	GO:0017171	MF	3	serine hydrolase activity	3
	9.15e-08	212	514	35	0.068	0.165	GO:0008236	MF	3	serine-type peptidase activity	3
	1.04e-07	192	514	33	0.064	0.172	GO:0004252	MF	3	serine-type endopeptidase activity	4
	2.68e-07	111	514	24	0.047	0.216	GO:0004553	MF	3	hydrolase activity, hydrolyzing O-glycosyl compounds	4
	4.23e-07	519	514	59	0.115	0.114	GO:0006508	BP	10	proteolysis	1
	1.12e-06	18	514	10	0.019	0.556	GO:0099132	BP	9	ATP hydrolysis coupled cation transmembrane transport	1
	1.12e-06	18	514	10	0.019	0.556	GO:0090662	BP	9	ATP hydrolysis coupled transmembrane transport	5
	1.12e-06	18	514	10	0.019	0.556	GO:0099131	BP	9	ATP hydrolysis coupled ion transmembrane transport	3
	1.12e-06	18	514	10	0.019	0.556	GO:0015988	BP	9	energy coupled proton transmembrane transport, against electrochemical gradient	2
	1.12e-06	18	514	10	0.019	0.556	GO:0015991	BP	9	ATP hydrolysis coupled proton transport	3
	1.12e-06	18	514	10	0.019	0.556	GO:0033176	CC	2	proton-transporting V-type ATPase complex	3
	1.22e-06	14	514	9	0.018	0.643	GO:0016675	MF	3	oxidoreductase activity, acting on a heme group of donors	3
	1.22e-06	14	514	9	0.018	0.643	GO:0016676	MF	3	oxidoreductase activity, acting on a heme group of donors, oxygen as acceptor	4
	1.22e-06	14	514	9	0.018	0.643	GO:0015002	MF	3	heme-copper terminal oxidase activity	3
	1.22e-06	14	514	9	0.018	0.643	GO:0004129	MF	3	cytochrome-c oxidase activity	5
	1.63e-06	202	514	32	0.062	0.158	GO:0005975	BP	5	carbohydrate metabolic process	1
	2.12e-06	70	514	18	0.035	0.257	GO:0042626	MF	4	ATPase activity, coupled to transmembrane movement of substances	3
	3.03e-06	986	514	89	0.173	0.09	GO:0006810	BP	9	transport	3
	3.89e-06	991	514	89	0.173	0.09	GO:0051234	BP	9	establishment of localization	2
	7.9e-06	21	514	10	0.019	0.476	GO:0070469	CC	2	respiratory chain	3
	1.02e-05	1011	514	89	0.173	0.088	GO:0051179	BP	9	localization	1
	1.02e-05	142	514	25	0.049	0.176	GO:0004497	MF	3	monooxygenase activity	3
	1.31e-05	154	514	26	0.051	0.169	GO:0098796	CC	2	membrane protein complex	1
	1.46e-05	329	514	41	0.08	0.125	GO:0004175	MF	3	endopeptidase activity	3
	1.63e-05	13	514	8	0.016	0.615	GO:0005746	CC	2	mitochondrial respiratory chain	1
	1.97e-05	157	514	26	0.051	0.166	GO:0005506	MF	1	iron ion binding	1
	1.99e-05	3365	514	222	0.432	0.066	GO:0031224	CC	2	intrinsic component of membrane	3
	2.06e-05	80	514	18	0.035	0.225	GO:0034220	BP	9	ion transmembrane transport	1
	2.07e-05	168	514	27	0.053	0.161	GO:0016705	MF	3	oxidoreductase activity, acting on paired donors, with incorporation or reduction of molecular oxygen	3
	2.58e-05	159	514	26	0.051	0.164	GO:0020037	MF	8	heme binding	2
	2.94e-05	160	514	26	0.051	0.163	GO:0046906	MF	8	tetrapyrrole binding	1
	2.98e-05	3361	514	221	0.43	0.066	GO:0016021	CC	2	integral component of membrane	4
	3.64e-05	14	514	8	0.016	0.571	GO:0033178	CC	2	proton-transporting two-sector ATPase complex, catalytic domain	2
	4.76e-05	197	514	29	0.056	0.147	GO:0008324	MF	3	cation transmembrane transporter activity	1
	4.96e-05	59	514	15	0.029	0.254	GO:0098662	BP	9	inorganic cation transmembrane transport	3
	5.51e-05	187	514	28	0.054	0.15	GO:0022890	MF	3	inorganic cation transmembrane transporter activity	2
	6.01e-05	68	514	16	0.031	0.235	GO:0015399	MF	4	primary active transmembrane transporter activity	1
	6.01e-05	68	514	16	0.031	0.235	GO:0015405	MF	4	P-P-bond-hydrolysis-driven transmembrane transporter activity	2
	6.32e-05	60	514	15	0.029	0.25	GO:0098660	BP	9	inorganic ion transmembrane transport	2
	6.32e-05	60	514	15	0.029	0.25	GO:0098655	BP	9	cation transmembrane transport	2
	6.96e-05	374	514	43	0.084	0.115	GO:0048037	MF	8	cofactor binding	1
	0.000114	71	514	16	0.031	0.225	GO:0043492	MF	4	ATPase activity, coupled to movement of substances	1
	0.00016	48	514	13	0.025	0.271	GO:0009055	MF	3	electron transfer activity	3
	0.000431	13	514	7	0.014	0.538	GO:0098803	CC	2	respiratory chain complex	2
	0.000631	38	514	11	0.021	0.289	GO:0044455	CC	2	mitochondrial membrane part	1
	Cluster-7 GO terms (Biological, Cellular component and Molecular Function)
	p-value	T	Q	Q&T	Q&T/Q	Q&T/T	term ID	t type	t group	t name	t depth
	5.81e-08	27	954	16	0.017	0.593	GO:0005929	CC	3	cilium	3
	7.84e-08	101	954	32	0.034	0.317	GO:0015630	CC	4	microtubule cytoskeleton	1
	2.54e-07	29	954	16	0.017	0.552	GO:0042995	CC	3	cell projection	1
	2.54e-07	29	954	16	0.017	0.552	GO:0120025	CC	3	plasma membrane bounded cell projection	2
	1.19e-06	24	954	14	0.015	0.583	GO:0030286	CC	2	dynein complex	1
	1.47e-06	112	954	32	0.034	0.286	GO:0007017	BP	1	microtubule-based process	1
	3.43e-05	57	954	20	0.021	0.351	GO:0007018	BP	1	microtubule-based movement	2
	3.8e-05	133	954	33	0.035	0.248	GO:0044430	CC	5	cytoskeletal part	1
	0.000436	71	954	21	0.022	0.296	GO:0006928	BP	1	movement of cell or subcellular component	1
	Cluster-9 GO terms (Biological, Cellular component and Molecular Function)
	p-value	T	Q	Q&T	Q&T/Q	Q&T/T	term ID	t type	t group	t name	t depth
	7.65e-08	450	1367	107	0.078	0.238	GO:0071840	BP	5	cellular component organization or biogenesis	1
	6.56e-05	208	1367	55	0.04	0.264	GO:0044085	BP	5	cellular component biogenesis	2
	9.62e-06	79	1367	30	0.022	0.38	GO:0022613	BP	5	ribonucleoprotein complex biogenesis	3
	1.13e-06	2370	1367	396	0.29	0.167	GO:0043170	BP	5	macromolecule metabolic process	1
	1.01e-12	626	1367	152	0.111	0.243	GO:0043412	BP	5	macromolecule modification	2
	1.82e-09	571	1367	133	0.097	0.233	GO:0036211	BP	5	protein modification process	3
	3.43e-09	973	1367	199	0.146	0.205	GO:0010467	BP	5	gene expression	2
	2.35e-07	3519	1367	560	0.41	0.159	GO:0009987	BP	5	cellular process	1
	4.99e-06	103	1367	36	0.026	0.35	GO:0007049	BP	5	cell cycle	2
	5.72e-05	409	1367	91	0.067	0.222	GO:0016043	BP	5	cellular component organization	2
	1.51e-06	1321	1367	242	0.177	0.183	GO:1901360	BP	5	organic cyclic compound metabolic process	1
	2.95e-06	882	1367	173	0.127	0.196	GO:0009059	BP	5	macromolecule biosynthetic process	1
	2.89e-05	546	1367	115	0.084	0.211	GO:0019222	BP	5	regulation of metabolic process	1
	4.46e-05	532	1367	112	0.082	0.211	GO:0060255	BP	5	regulation of macromolecule metabolic process	2
	0.000601	503	1367	103	0.075	0.205	GO:0080090	BP	5	regulation of primary metabolic process	2
	7.52e-07	2525	1367	419	0.307	0.166	GO:0044237	BP	5	cellular metabolic process	1
	6.69e-07	1310	1367	242	0.177	0.185	GO:0046483	BP	5	heterocycle metabolic process	2
	7.21e-07	1311	1367	242	0.177	0.185	GO:0006725	BP	5	cellular aromatic compound metabolic process	2
	4.35e-06	1530	1367	271	0.198	0.177	GO:0034641	BP	5	cellular nitrogen compound metabolic process	2
	7.14e-12	1707	1367	324	0.237	0.19	GO:0044260	BP	5	cellular macromolecule metabolic process	2
	9.47e-10	856	1367	182	0.133	0.213	GO:0044267	BP	5	cellular protein metabolic process	3
	1.82e-09	571	1367	133	0.097	0.233	GO:0006464	BP	5	cellular protein modification process	4
	2.47e-06	880	1367	173	0.127	0.197	GO:0034645	BP	5	cellular macromolecule biosynthetic process	3
	7.72e-05	64	1367	25	0.018	0.391	GO:0051246	BP	5	regulation of protein metabolic process	1
	0.000117	61	1367	24	0.018	0.393	GO:0032268	BP	5	regulation of cellular protein metabolic process	2
	2.72e-07	1272	1367	238	0.174	0.187	GO:0006139	BP	5	nucleobase-containing compound metabolic process	1
	8.02e-09	1095	1367	217	0.159	0.198	GO:0090304	BP	5	nucleic acid metabolic process	2
	7.39e-12	773	1367	175	0.128	0.226	GO:0016070	BP	5	RNA metabolic process	3
	2.21e-05	127	1367	40	0.029	0.315	GO:0034660	BP	5	ncRNA metabolic process	4
	2.32e-05	197	1367	54	0.04	0.274	GO:0006396	BP	5	RNA processing	4
	0.000331	29	1367	15	0.011	0.517	GO:0006413	BP	5	translational initiation	1
	0.000836	12	1367	9	0.007	0.75	GO:0006289	BP	7	nucleotide-excision repair	1
	0.000149	111	1367	35	0.026	0.315	GO:0051276	BP	8	chromosome organization	1
	0.000537	17	1367	11	0.008	0.647	GO:0002181	BP	9	cytoplasmic translation	1
	9.58e-05	27	1367	15	0.011	0.556	GO:0006261	BP	11	DNA-dependent DNA replication	1
	0.000508	97	1367	31	0.023	0.32	GO:0048519	BP	10	negative regulation of biological process	1
	1.61e-22	1646	1367	352	0.257	0.214	GO:0043226	CC	2	organelle	1
	5.02e-26	1299	1367	305	0.223	0.235	GO:0043227	CC	2	membrane-bounded organelle	2
	5.5e-11	2765	1367	475	0.347	0.172	GO:0005623	CC	2	cell	1
	1.11e-08	163	1367	54	0.04	0.331	GO:0031974	CC	2	membrane-enclosed lumen	1
	7.9e-05	686	1367	136	0.099	0.198	GO:0044422	CC	2	organelle part	1
	1.11e-08	163	1367	54	0.04	0.331	GO:0043233	CC	2	organelle lumen	2
	1.16e-11	2707	1367	470	0.344	0.174	GO:0044464	CC	2	cell part	1
	1.69e-27	2243	1367	461	0.337	0.206	GO:0005622	CC	2	intracellular	2
	9.53e-26	1962	1367	412	0.301	0.21	GO:0044424	CC	2	intracellular part	3
	2.06e-23	1629	1367	352	0.257	0.216	GO:0043229	CC	2	intracellular organelle	4
	4.67e-25	1279	1367	299	0.219	0.234	GO:0043231	CC	2	intracellular membrane-bounded organelle	5
	4.85e-35	916	1367	258	0.189	0.282	GO:0005634	CC	2	nucleus	6
	1.11e-08	163	1367	54	0.04	0.331	GO:0070013	CC	2	intracellular organelle lumen	4
	4.2e-05	679	1367	136	0.099	0.2	GO:0044446	CC	2	intracellular organelle part	4
	5.08e-11	203	1367	67	0.049	0.33	GO:0044428	CC	2	nuclear part	5
	1.16e-09	133	1367	49	0.036	0.368	GO:0031981	CC	2	nuclear lumen	6
	0.000254	32	1367	16	0.012	0.5	GO:0005730	CC	2	nucleolus	6
	0.000103	1129	1367	204	0.149	0.181	GO:0016740	MF	6	transferase activity	1
	0.000731	143	1367	40	0.029	0.28	GO:0140098	MF	1	catalytic activity, acting on RNA	1
	1.73e-27	5622	1367	926	0.677	0.165	GO:0005488	MF	3	binding	1
	6.49e-08	2266	1367	388	0.284	0.171	GO:0043167	MF	3	ion binding	2
	8.15e-06	1107	1367	206	0.151	0.186	GO:0043168	MF	3	anion binding	3
	0.00095	1143	1367	201	0.147	0.176	GO:0036094	MF	3	small molecule binding	2
	2.15e-13	2847	1367	498	0.364	0.175	GO:0097159	MF	3	organic cyclic compound binding	2
	1.86e-13	2845	1367	498	0.364	0.175	GO:1901363	MF	3	heterocyclic compound binding	2
	0.000364	1088	1367	195	0.143	0.179	GO:1901265	MF	3	nucleoside phosphate binding	3
	1.73e-07	920	1367	184	0.135	0.2	GO:0035639	MF	3	purine ribonucleoside triphosphate binding	4
	0.000364	1088	1367	195	0.143	0.179	GO:0000166	MF	3	nucleotide binding	4
	1.54e-07	925	1367	185	0.135	0.2	GO:0017076	MF	3	purine nucleotide binding	5
	1.15e-06	759	1367	155	0.113	0.204	GO:0030554	MF	3	adenyl nucleotide binding	6
	1.34e-16	1739	1367	347	0.254	0.2	GO:0003676	MF	3	nucleic acid binding	3
	4.19e-08	390	1367	97	0.071	0.249	GO:0003723	MF	3	RNA binding	4
	2.3e-16	2019	1367	389	0.285	0.193	GO:0005515	MF	3	protein binding	2
	6.24e-06	1032	1367	195	0.143	0.189	GO:0097367	MF	3	carbohydrate derivative binding	2
	2.93e-07	932	1367	185	0.135	0.198	GO:0032553	MF	3	ribonucleotide binding	3
	1.4e-07	924	1367	185	0.135	0.2	GO:0032555	MF	3	purine ribonucleotide binding	4
	1.04e-06	758	1367	155	0.113	0.204	GO:0032559	MF	3	adenyl ribonucleotide binding	5
	1.42e-06	755	1367	154	0.113	0.204	GO:0005524	MF	3	ATP binding	6
	2.44e-05	95	1367	33	0.024	0.347	GO:0004386	MF	4	helicase activity	1
	0.000339	191	1367	50	0.037	0.262	GO:0016874	MF	12	ligase activity	1
	Cluster-10 GO terms (Biological, Cellular component and Molecular Function)
	p-value	T	Q	Q&T	Q&T/Q	Q&T/T	term ID	t type	t group	t name	t depth
	4.05e-24	1962	798	271	0.34	0.138	GO:0044424	CC	3	intracellular part	3
	1.34e-23	2243	798	296	0.371	0.132	GO:0005622	CC	3	intracellular	2
	7.59e-22	826	798	148	0.185	0.179	GO:0032991	CC	6	protein-containing complex	1
	2.38e-20	916	798	155	0.194	0.169	GO:0005634	CC	3	nucleus	6
	1.72e-17	203	798	59	0.074	0.291	GO:0044428	CC	3	nuclear part	3
	4.8e-16	1095	798	164	0.206	0.15	GO:0090304	BP	2	nucleic acid metabolic process	4
	6.43e-15	1272	798	179	0.224	0.141	GO:0006139	BP	2	nucleobase-containing compound metabolic process	3
	1.13e-14	1299	798	181	0.227	0.139	GO:0043227	CC	3	membrane-bounded organelle	2
	1.14e-14	1279	798	179	0.224	0.14	GO:0043231	CC	3	intracellular membrane-bounded organelle	5
	1.16e-14	1629	798	213	0.267	0.131	GO:0043229	CC	3	intracellular organelle	4
	2.75e-14	1310	798	181	0.227	0.138	GO:0046483	BP	2	heterocycle metabolic process	3
	2.98e-14	1311	798	181	0.227	0.138	GO:0006725	BP	2	cellular aromatic compound metabolic process	3
	3.94e-14	1646	798	213	0.267	0.129	GO:0043226	CC	3	organelle	1
	6.57e-14	1321	798	181	0.227	0.137	GO:1901360	BP	2	organic cyclic compound metabolic process	2
	6.83e-14	1739	798	221	0.277	0.127	GO:0003676	MF	1	nucleic acid binding	3
	2.96e-13	197	798	52	0.065	0.264	GO:0006396	BP	2	RNA processing	6
	4.58e-13	390	798	78	0.098	0.2	GO:0003723	MF	1	RNA binding	4
	3.3e-12	1530	798	196	0.246	0.128	GO:0034641	BP	2	cellular nitrogen compound metabolic process	2
	1.03e-11	2525	798	284	0.356	0.112	GO:0044237	BP	2	cellular metabolic process	2
	2.4e-11	773	798	118	0.148	0.153	GO:0016070	BP	2	RNA metabolic process	5
	4.99e-11	2707	798	297	0.372	0.11	GO:0044464	CC	3	cell part	1
	1.54e-10	2765	798	300	0.376	0.108	GO:0005623	CC	3	cell	1
	1.02e-09	1707	798	204	0.256	0.12	GO:0044260	BP	2	cellular macromolecule metabolic process	3
	1.04e-09	3519	798	359	0.45	0.102	GO:0009987	BP	2	cellular process	1
	1.7e-09	2370	798	262	0.328	0.111	GO:0043170	BP	2	macromolecule metabolic process	2
	2.33e-09	973	798	133	0.167	0.137	GO:0010467	BP	2	gene expression	3
	4.43e-09	679	798	102	0.128	0.15	GO:0044446	CC	3	intracellular organelle part	2
	4.57e-09	133	798	36	0.045	0.271	GO:0031981	CC	3	nuclear lumen	4
	8.29e-09	686	798	102	0.128	0.149	GO:0044422	CC	3	organelle part	1
	1.11e-08	2845	798	299	0.375	0.105	GO:1901363	MF	1	heterocyclic compound binding	2
	1.21e-08	2847	798	299	0.375	0.105	GO:0097159	MF	1	organic cyclic compound binding	2
	3.23e-08	79	798	26	0.033	0.329	GO:0005654	CC	3	nucleoplasm	4
	5.54e-08	75	798	25	0.031	0.333	GO:0044451	CC	3	nucleoplasm part	5
	1.06e-07	77	798	25	0.031	0.325	GO:0006260	BP	2	DNA replication	2
	1.12e-07	83	798	26	0.033	0.313	GO:1990234	CC	6	transferase complex	3
	1.51e-07	163	798	38	0.048	0.233	GO:0031974	CC	3	membrane-enclosed lumen	1
	1.51e-07	163	798	38	0.048	0.233	GO:0043233	CC	3	organelle lumen	2
	1.51e-07	163	798	38	0.048	0.233	GO:0070013	CC	3	intracellular organelle lumen	3
	1.72e-07	2658	798	278	0.348	0.105	GO:0006807	BP	2	nitrogen compound metabolic process	1
	1.85e-07	116	798	31	0.039	0.267	GO:0006974	BP	2	cellular response to DNA damage stimulus	2
	2.52e-07	218	798	45	0.056	0.206	GO:1902494	CC	6	catalytic complex	2
	6.16e-07	89	798	26	0.033	0.292	GO:0016071	BP	2	mRNA metabolic process	6
	9.78e-07	110	798	29	0.036	0.264	GO:0006281	BP	2	DNA repair	3
	1.97e-06	81	798	24	0.03	0.296	GO:0034470	BP	2	ncRNA processing	7
	3.51e-06	71	798	22	0.028	0.31	GO:0006397	BP	2	mRNA processing	7
	4.63e-06	131	798	31	0.039	0.237	GO:0033554	BP	2	cellular response to stress	1
	8.98e-06	2926	798	292	0.366	0.1	GO:0044238	BP	2	primary metabolic process	1
	2.53e-05	5622	798	500	0.627	0.089	GO:0005488	MF	1	binding	1
	3.27e-05	127	798	29	0.036	0.228	GO:0034660	BP	2	ncRNA metabolic process	6
	0.000143	143	798	30	0.038	0.21	GO:0009057	BP	2	macromolecule catabolic process	3
	0.000184	122	798	27	0.034	0.221	GO:0044265	BP	2	cellular macromolecule catabolic process	4
	0.000197	33	798	13	0.016	0.394	GO:0061695	CC	6	transferase complex, transferring phosphorus-containing groups	4
	0.000251	9	798	7	0.009	0.778	GO:0031109	BP	4	microtubule polymerization or depolymerization	1
	0.000254	24	798	11	0.014	0.458	GO:0006401	BP	2	RNA catabolic process	1
	0.0003	3077	798	296	0.371	0.096	GO:0071704	BP	2	organic substance metabolic process	1
	0.00035	450	798	64	0.08	0.142	GO:0071840	BP	5	cellular component organization or biogenesis	1
	0.000425	880	798	106	0.133	0.12	GO:0034645	BP	2	cellular macromolecule biosynthetic process	1
	0.000475	882	798	106	0.133	0.12	GO:0009059	BP	2	macromolecule biosynthetic process	3
	0.000529	192	798	35	0.044	0.182	GO:0006950	BP	2	response to stress	1
	0.000555	85	798	21	0.026	0.247	GO:0005694	CC	3	chromosome	1
	0.000653	344	798	52	0.065	0.151	GO:0006259	BP	2	DNA metabolic process	5
	0.000692	7	798	6	0.008	0.857	GO:0046785	BP	4	microtubule polymerization	1
	0.000692	7	798	6	0.008	0.857	GO:0007020	BP	4	microtubule nucleation	2
	0.000774	73	798	19	0.024	0.26	GO:0044427	CC	3	chromosomal part	2
	Cluster-11 GO terms (Biological, Cellular component and Molecular Function)
	p-value	T	Q	Q&T	Q&T/Q	Q&T/T	term ID	t type	t group	t name	t depth
	0.000308	302	361	29	0.08	0.096	GO:0006811	BP	4	ion transport	1
	0.000448	3578	361	167	0.463	0.047	GO:0016020	CC	3	membrane	1
	0.000449	3361	361	159	0.44	0.047	GO:0016021	CC	2	integral component of membrane	2
	0.000487	3365	361	159	0.44	0.047	GO:0031224	CC	2	intrinsic component of membrane	1
	0.000935	583	361	43	0.119	0.074	GO:0005215	MF	1	transporter activity	1
	Cluster-12 GO terms (Biological, Cellular component and Molecular Function)
	p-value	T	Q	Q&T	Q&T/Q	Q&T/T	term ID	t type	t group	t name	t depth
	1.02e-53	620	793	172	0.217	0.277	GO:0016491	MF	3	oxidoreductase activity	3
	3.53e-50	506	793	150	0.189	0.296	GO:0055114	BP	1	oxidation-reduction process	3
	4.33e-44	374	793	121	0.153	0.324	GO:0048037	MF	4	cofactor binding	1
	4.68e-43	3661	793	465	0.586	0.127	GO:0003824	MF	3	catalytic activity	2
	1.59e-19	159	793	54	0.068	0.34	GO:0020037	MF	4	heme binding	2
	2.23e-19	160	793	54	0.068	0.338	GO:0046906	MF	4	tetrapyrrole binding	1
	5.62e-18	170	793	54	0.068	0.318	GO:0050662	MF	4	coenzyme binding	2
	1.11e-17	228	793	63	0.079	0.276	GO:0019752	BP	1	carboxylic acid metabolic process	3
	1.43e-17	229	793	63	0.079	0.275	GO:0006082	BP	1	organic acid metabolic process	1
	1.43e-17	229	793	63	0.079	0.275	GO:0043436	BP	1	oxoacid metabolic process	2
	2.27e-17	157	793	51	0.064	0.325	GO:0005506	MF	6	iron ion binding	1
	4.44e-17	428	793	90	0.113	0.21	GO:0044281	BP	1	small molecule metabolic process	3
	3.77e-14	3685	793	388	0.489	0.105	GO:0008152	BP	1	metabolic process	2
	2.61e-12	168	793	46	0.058	0.274	GO:0016705	MF	3	oxidoreductase activity, acting on paired donors, with incorporation or reduction of molecular oxygen	4
	3.66e-11	36	793	20	0.025	0.556	GO:0016999	BP	1	antibiotic metabolic process	2
	5.34e-11	181	793	46	0.058	0.254	GO:0017144	BP	1	drug metabolic process	1
	5.89e-11	142	793	40	0.05	0.282	GO:0004497	MF	3	monooxygenase activity	4
	8.64e-10	29	793	17	0.021	0.586	GO:0072350	BP	1	tricarboxylic acid metabolic process	4
	8.64e-10	29	793	17	0.021	0.586	GO:0006101	BP	1	citrate metabolic process	5
	2.44e-09	72	793	26	0.033	0.361	GO:0016614	MF	3	oxidoreductase activity, acting on CH-OH group of donors	4
	6.84e-09	28	793	16	0.02	0.571	GO:0009060	BP	1	aerobic respiration	6
	6.84e-09	28	793	16	0.02	0.571	GO:0006099	BP	1	tricarboxylic acid cycle	6
	1.01e-08	76	793	26	0.033	0.342	GO:0050660	MF	4	flavin adenine dinucleotide binding	3
	8.11e-08	71	793	24	0.03	0.338	GO:0006091	BP	1	generation of precursor metabolites and energy	1
	1.12e-07	41	793	18	0.023	0.439	GO:0045333	BP	1	cellular respiration	5
	1.48e-07	37	793	17	0.021	0.459	GO:0016616	MF	3	oxidoreductase activity, acting on the CH-OH group of donors, NAD or NADP as acceptor	5
	4.59e-07	44	793	18	0.023	0.409	GO:1901605	BP	1	alpha-amino acid metabolic process	2
	6.21e-07	202	793	42	0.053	0.208	GO:0005975	BP	2	carbohydrate metabolic process	1
	2.05e-06	33	793	15	0.019	0.455	GO:0044282	BP	1	small molecule catabolic process	1
	2.44e-06	48	793	18	0.023	0.375	GO:0015980	BP	1	energy derivation by oxidation of organic compounds	4
	7.59e-06	31	793	14	0.018	0.452	GO:0051287	MF	4	NAD binding	3
	1.32e-05	116	793	28	0.035	0.241	GO:0006520	BP	1	cellular amino acid metabolic process	1
	5.08e-05	5889	793	515	0.649	0.087	GO:0008150	BP	1	biological_process	1
	7.6e-05	22	793	11	0.014	0.5	GO:0016054	BP	1	organic acid catabolic process	1
	7.6e-05	22	793	11	0.014	0.5	GO:0046395	BP	1	carboxylic acid catabolic process	2
	0.000217	8269	793	678	0.855	0.082	GO:0003674	MF	3	molecular_function	1
	0.000585	17	793	9	0.011	0.529	GO:0009064	BP	1	glutamine family amino acid metabolic process	3
	0.00064	31	793	12	0.015	0.387	GO:0006754	BP	5	ATP biosynthetic process	1
	0.000652	7	793	6	0.008	0.857	GO:0004448	MF	3	isocitrate dehydrogenase activity	6
	0.000732	10	793	7	0.009	0.7	GO:0009084	BP	1	glutamine family amino acid biosynthetic process	4
	Cluster-13 GO terms (Biological, Cellular component and Molecular Function)
	p-value	T	Q	Q&T	Q&T/Q	Q&T/T	term ID	t type	t group	t name	t depth
	6.11e-09	1739	227	79	0.348	0.045	GO:0003676	MF	1	nucleic acid binding	2
	1.01e-06	2845	227	103	0.454	0.036	GO:1901363	MF	1	heterocyclic compound binding	1
	1.05e-06	2847	227	103	0.454	0.036	GO:0097159	MF	1	organic cyclic compound binding	1
	0.000103	1095	227	50	0.22	0.046	GO:0090304	BP	2	nucleic acid metabolic process	1
	0.00022	648	227	35	0.154	0.054	GO:0003677	MF	1	DNA binding	3
	0.000763	344	227	23	0.101	0.067	GO:0006259	BP	2	DNA metabolic process	1
